# Supplementary material for: Prevalence of the eosinophilic phenotype among severe asthma patients in Brazil: the BRAEOS study
Source: PubMed Central journal article supplement — J Bras Pneumol. 2022 Jul 1;48(3):e20210367. doi: 10.36416/1806-3756/e20210367 (PMC9262440; doi:10.36416/1806-3756/e20210367), 2022-07-01
Supplement: 1806-3756-jbpneu-48-03-e20210367-suppl1.pdf [file 1806-3756-jbpneu-48-03-e20210367-suppl1.pdf]

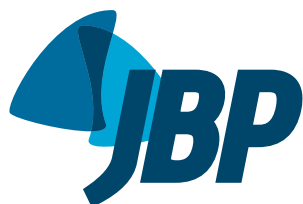

# Prevalence of the eosinophilic phenotype among severe asthma patients in Brazil: the BRAEOS study

Rodrigo Athanzio<sup>1</sup>, Rafael Stelmach<sup>1</sup>, Martti Antila<sup>2</sup>,  
 Adelmir Souza-Machado<sup>3</sup>, L. Karla Arruda<sup>4</sup>, Alcindo Cerci Neto<sup>5</sup>,  
 Faradiba Sarquis Serpa<sup>6</sup>, Daniela Cavalet Blanco<sup>7</sup>, Marina Lima<sup>8</sup>,  
 Pedro Bianchi Júnior<sup>9</sup>, Márcio Penha<sup>10</sup>, Marcelo Fouad Rabahi<sup>11</sup>

**Table S1.** Characteristics of the study participants and comorbidities in the sample as a whole and by chronic oral corticosteroid use.

| Characteristic                                            | Total<br>(N = 387) | C-OCS users<br>(n = 14) | C-OCS nonusers<br>(n = 373) | p        |
|-----------------------------------------------------------|--------------------|-------------------------|-----------------------------|----------|
| Age, years                                                |                    |                         |                             |          |
| Median (IQR)                                              | 54.0 (19.0-93.0)   | 56.0 (34.0-72.0)        | 53.0 (19.0-93.0)            | 0.3902   |
| Sex, n (%)                                                |                    |                         |                             |          |
| Female                                                    | 304 (78.6)         | 10 (71.4)               | 294 (78.8)                  | 0.5150   |
| Male                                                      | 83 (21.4)          | 4 (28.6)                | 79 (21.2)                   |          |
| BMI (kg/m <sup>2</sup> )                                  |                    |                         |                             |          |
| Median                                                    | 29.0 (14.9-49.0)   | 31.8 (24.3-44.8)        | 28.7 (14.9-49.0)            | 0.0735   |
| Moderate asthma exacerbations (in the previous 12 months) |                    |                         |                             |          |
| 0 exacerbations                                           | 103 (26.7)         | 1 (7.1)                 | 102 (27.4)                  | 0.0639   |
| 1 exacerbation                                            | 70 (18.1)          | 1 (7.1)                 | 69 (18.5)                   |          |
| 2 exacerbations                                           | 71 (18.4)          | 2 (14.3)                | 69 (18.5)                   |          |
| ≥ 3 exacerbations                                         | 142 (36.8)         | 10 (71.4)               | 132 (35.5)                  |          |
| Severe asthma exacerbations (in the previous 12 months)   |                    |                         |                             |          |
| 0 exacerbations                                           | 370 (95.6)         | 11 (78.6)               | 359 (96.2)                  | 0.0164   |
| 1 exacerbation                                            | 13 (3.4)           | 2 (14.3)                | 11 (2.9)                    |          |
| 2 exacerbations                                           | 2 (0.5)            | 0 (0.0)                 | 2 (0.5)                     |          |
| ≥ 3 exacerbations                                         | 2 (0.5)            | 1 (7.1)                 | 1 (0.3)                     |          |
| Overall exacerbation rate (in the previous 12 months)     | 2.8                | 10.7                    | 2.5                         |          |
| Moderate exacerbation rate (in the previous 12 months)    | 2.7                | 10.3                    | 2.4                         |          |
| Severe exacerbation rate (in the previous 12 months)      | 0.1                | 0.4                     | 0.06                        |          |
| History of atopy                                          | 313 (81.7)         | 10 (71.4)               | 303 (82.1)                  | 0.2975   |
| Comorbidities                                             |                    |                         |                             |          |
| Rhinitis                                                  | 329 (85.0)         | 12 (85.7)               | 317 (85.0)                  | > 0.9999 |
| Gastroesophageal reflux                                   | 199 (51.4)         | 7 (50.0)                | 192 (51.5)                  | 0.9137   |
| Obesity                                                   | 173 (44.7)         | 9 (64.3)                | 164 (44.0)                  | 0.1333   |
| Hypertension                                              | 123 (31.8)         | 7 (50.0)                | 116 (31.1)                  | 0.1503   |
| Anxiety                                                   | 92 (23.8)          | 6 (42.9)                | 86 (23.1)                   | 0.1081   |
| Depression                                                | 76 (19.6)          | 5 (35.7)                | 71 (19.0)                   | 0.1624   |
| Osteoporosis                                              | 54 (14.0)          | 2 (14.3)                | 52 (13.9)                   | > 0.9999 |
| Type 2 diabetes                                           | 50 (12.9)          | 2 (14.3)                | 48 (12.9)                   | 0.6995   |
| Atopic dermatitis                                         | 39 (10.1)          | 2 (14.3)                | 37 (9.9)                    | 0.6414   |
| Nasal polyps                                              | 35 (9.0)           | 2 (14.3)                | 33 (8.8)                    | 0.3667   |
| Sleep apnea                                               | 25 (6.5)           | 2 (14.3)                | 23 (6.2)                    | 0.2266   |
| Cataract                                                  | 23 (5.9)           | 0 (0.0)                 | 23 (6.2)                    | > 0.9999 |
| Vocal cord dysfunction                                    | 19 (4.9)           | 0 (0.0)                 | 19 (5.1)                    | > 0.9999 |
| History of stroke                                         | 9 (2.3)            | 2 (14.3)                | 7 (1.9)                     | 0.0379   |
| Coronary artery disease                                   | 9 (2.3)            | 1 (7.1)                 | 8 (2.1)                     | 0.2848   |
| Heart failure                                             | 9 (2.3)            | 2 (14.3)                | 7 (1.9)                     | 0.0379   |
| None                                                      | 6 (1.6)            | 0 (0.0)                 | 6 (1.6)                     | > 0.9999 |
| Charlson Comorbidity Index                                |                    |                         |                             |          |
| Median (IQR)                                              | 1.0 (0.0-8.0)      | 2.0 (0.0-4.0)           | 1.0 (0.0-8.0)               | 0.4625   |

C-OCS: chronic oral corticosteroid.

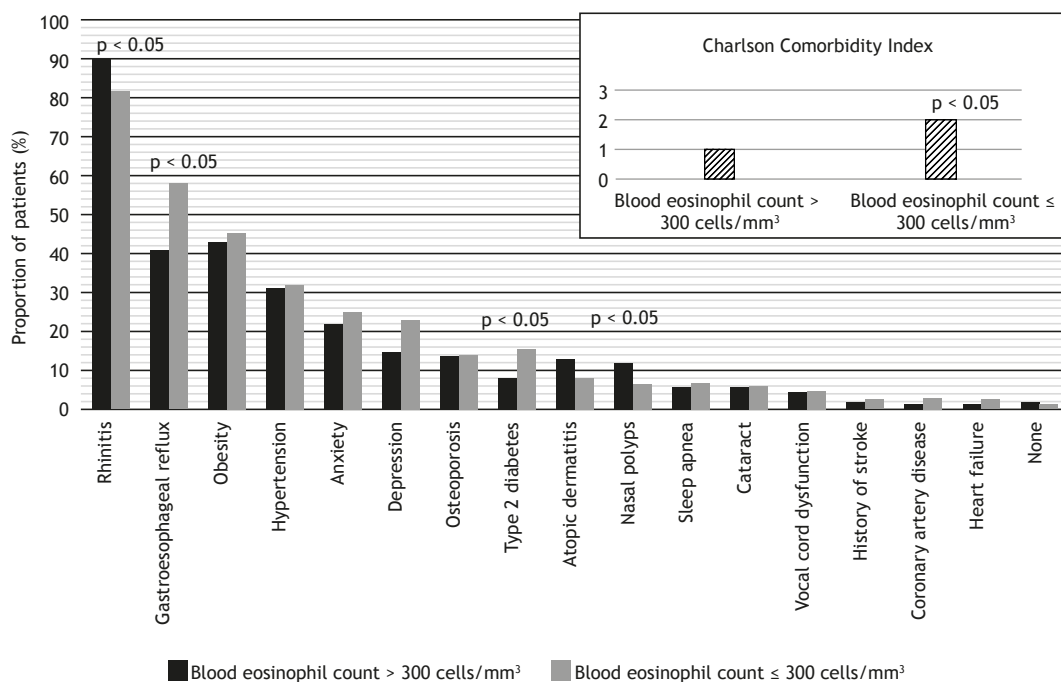

**Figure S1.** Comorbidities in patients with the eosinophilic phenotype of severe asthma.<sup>a</sup>

<sup>a</sup>To calculate the predicted values of pulmonary function variables, we used the equations published by Pereira CA, Sato T, Rodrigues SC. New reference values for forced spirometry in white adults in Brazil. *J Bras Pneumol.* 2007;33(4):397-406. <https://doi.org/10.1590/S1806-37132007000400008>
